# Supplementary material for: Comparative genomics reveals high genetic similarity among strains of Salmonella enterica serovar Infantis isolated from multiple sources in Brazil
Source: PubMed Central journal article supplement (PMC11114117; doi:10.7717/peerj.17306), 2024-05-20

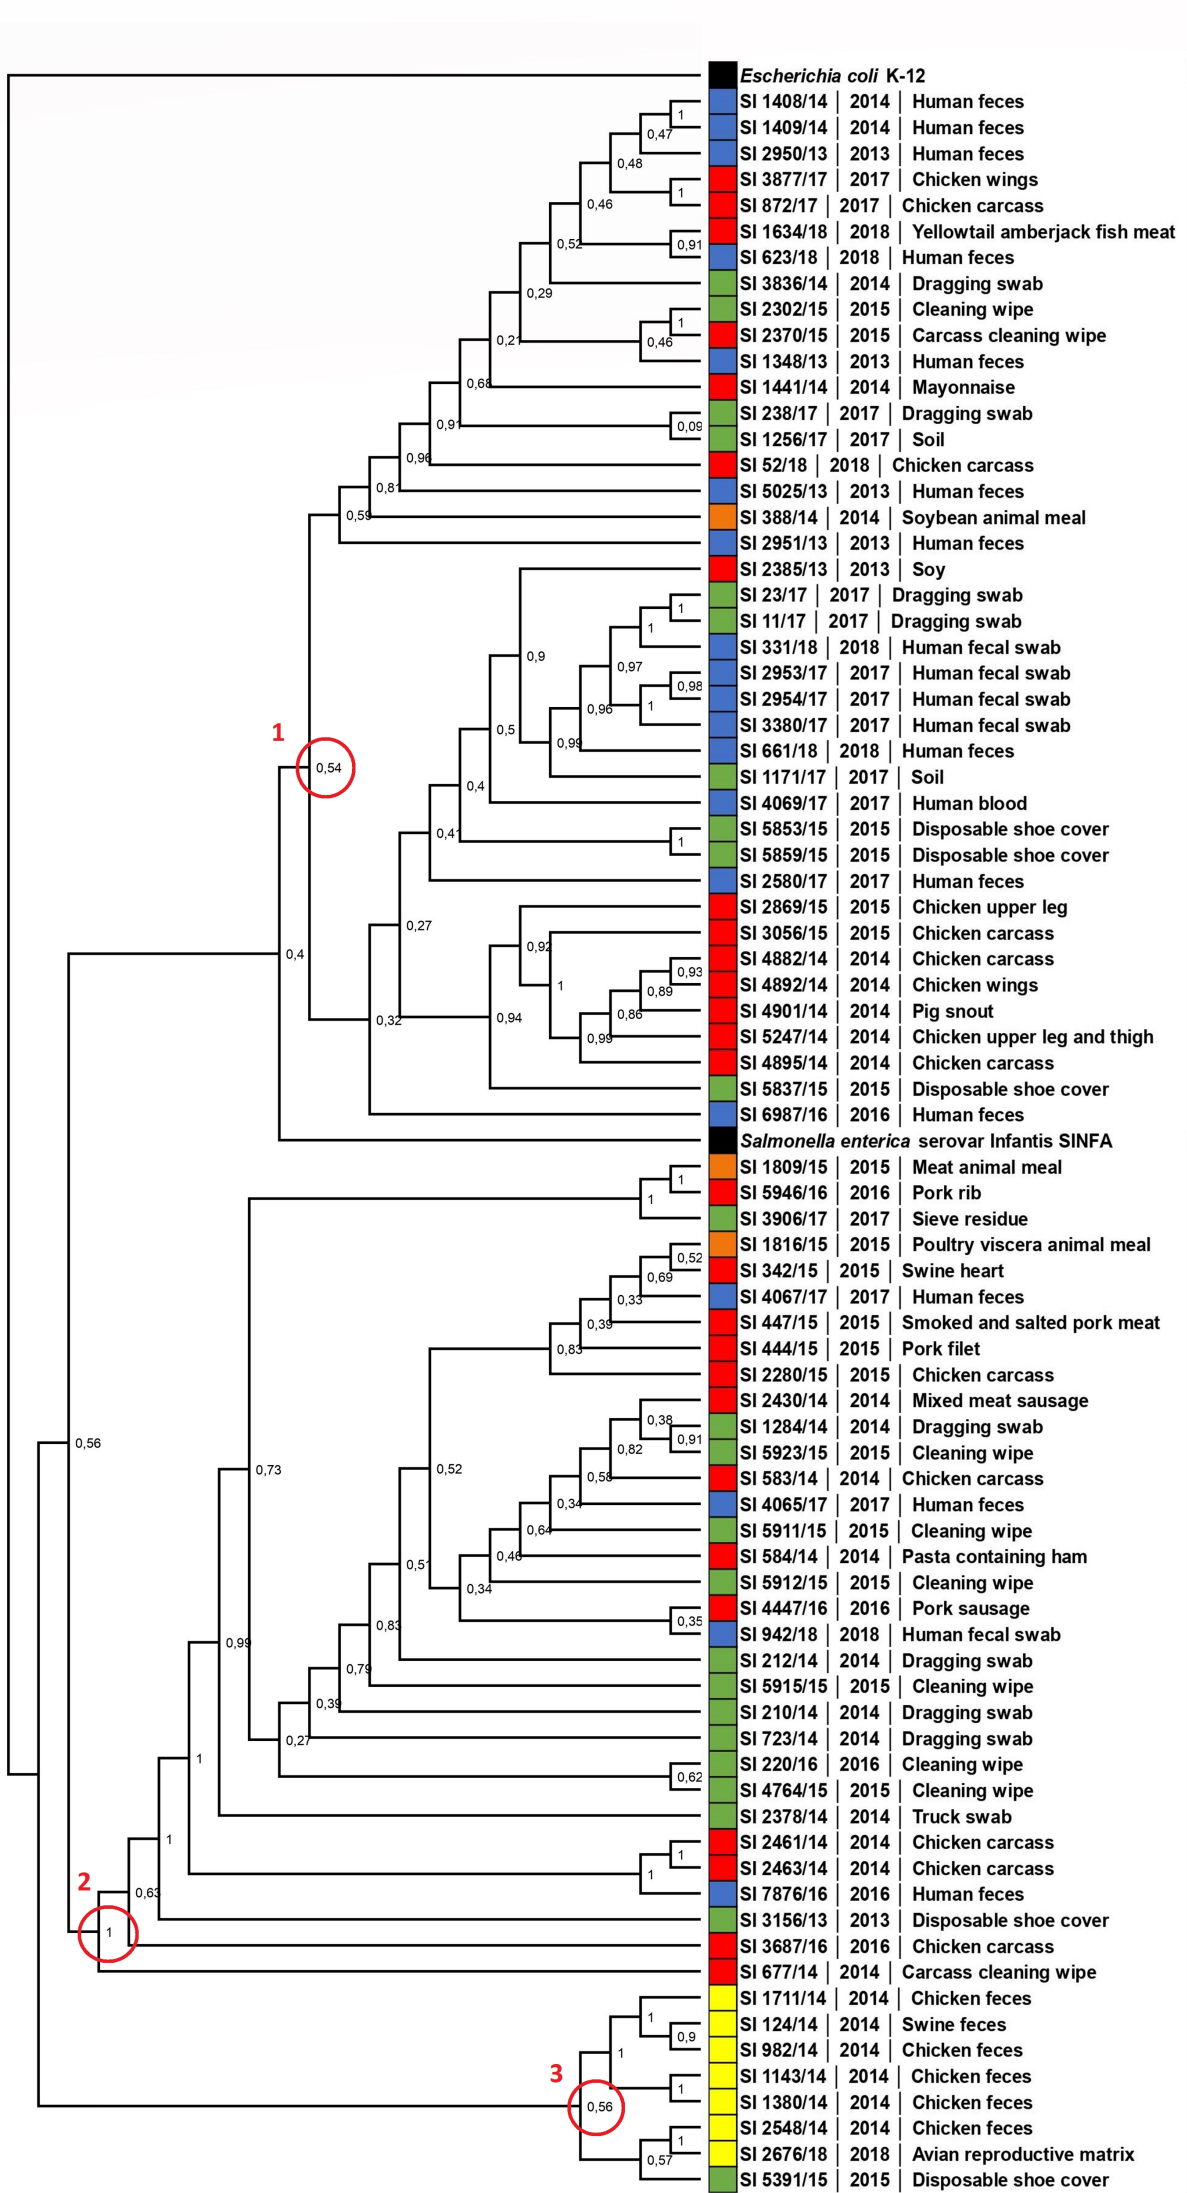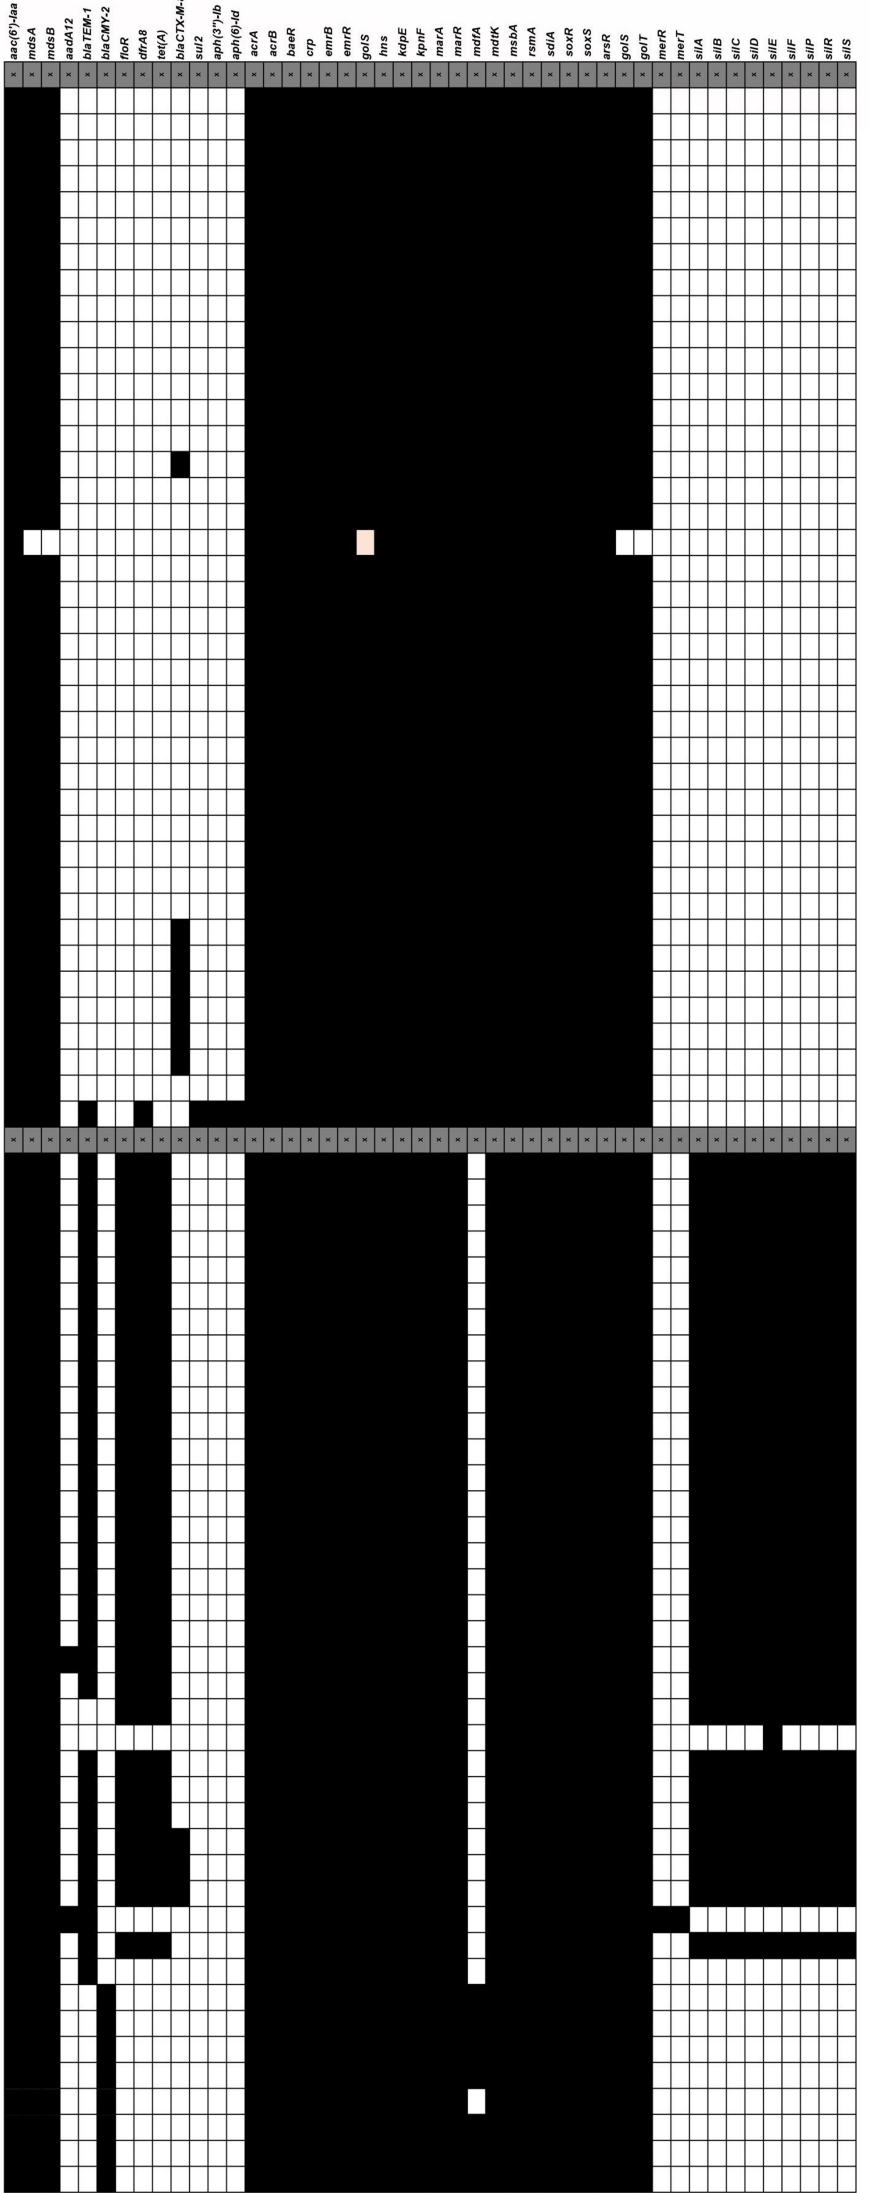

Supplement: peerj-12-17306-s001.pdf [file peerj-12-17306-s001.pdf]
