# Supplementary material for: Comparative genomics reveals high genetic similarity among strains of Salmonella enterica serovar Infantis isolated from multiple sources in Brazil
Source: PubMed Central journal article supplement (PMC11114117; doi:10.7717/peerj.17306), 2024-05-20
Supplement: peerj-12-17306-s002.pdf [file peerj-12-17306-s002.pdf]

**Table S1** – Occurrence of prophages in the 80 Brazilian genomes of *Salmonella* Infantis strains analyzed in the present study.

| Strain     | Year | Isolation source | Isolation material    | Prophages                                         |
|------------|------|------------------|-----------------------|---------------------------------------------------|
| SI 1348/13 | 2013 | Human            | Human feces           | Gifsy_1                                           |
| SI 2385/13 | 2013 | Food             | Soy                   | Yersin_L_413C                                     |
| SI 2950/13 | 2013 | Human            | Human feces           | Salmon_Fels_1, Yersin_L_413C                      |
| SI 2951/13 | 2013 | Human            | Human feces           | Gifsy_1, Escher_pro483                            |
| SI 3156/13 | 2013 | Environment      | Disposable shoe cover | Entero_BP_4795                                    |
| SI 5025/13 | 2013 | Human            | Human feces           | Gifsy_1, Yersin_L_413C, Salmon_SPN3UB, Entero_P4  |
| SI 124/14  | 2014 | Animal           | Swine feces           | Salmon_Fels_1, Entero_ES18                        |
| SI 210/14  | 2014 | Environment      | Dragging swab         | Gifsy_1                                           |
| SI 212/14  | 2014 | Environment      | Dragging swab         | Yersin_L_413C                                     |
| SI 388/14  | 2014 | Animal feed      | Soybean animal meal   | Salmon_Fels_1, Entero_BP_4795                     |
| SI 583/14  | 2014 | Food             | Chicken carcass       | Gifsy_1, Entero_BP_4795, Salmon_118970_sal3       |
| SI 584/14  | 2014 | Food             | Pasta containing ham  | Gifsy_1, Entero_BP_4795, Salmon_118970_sal3       |
| SI 677/14  | 2014 | Food             | Carcass cleaning wipe | Salmon_Fels_1, Stx2_c_1717                        |
| SI 723/14  | 2014 | Environment      | Dragging swab         | Salmon_Fels_1, Entero_BP_4795, Salmon_118970_sal3 |
| SI 982/14  | 2014 | Animal           | Chicken feces         | Gifsy_1                                           |
| SI 1143/14 | 2014 | Animal           | Chicken feces         | Salmon_Fels_1, Salmon_vB_SosS_Oslo                |
| SI 1284/14 | 2014 | Environment      | Dragging swab         | Salmon_Fels_1, Entero_BP_4795, Salmon_118970_sal3 |
| SI 1380/14 | 2014 | Animal           | Chicken feces         | Gifsy_1, Salmon_vB_SosS_Oslo                      |
| SI 1408/14 | 2014 | Human            | Human feces           | Gifsy_1, Escher_pro483                            |
| SI 1409/14 | 2014 | Human            | Human feces           | Gifsy_1, Yersin_L_413C                            |
| SI 1441/14 | 2014 | Food             | Mayonnaise            | Salmon_Fels_1, Yersin_L_413C, Entero_YYZ_2008     |
| SI 1711/14 | 2014 | Animal           | Chicken feces         | Gifsy_1, Escher_pro483                            |
| SI 2378/14 | 2014 | Environment      | Truck swab            | Gifsy_1, Entero_BP_4795, Salmon_118970_sal3       |
| SI 2430/14 | 2014 | Food             | Mixed meat sausage    | Gifsy_1, Entero_BP_4795, Salmon_118970_sal3       |
| SI 2461/14 | 2014 | Food             | Chicken carcass       | Entero_BP_4795, Salmon_118970_sal3                |
| SI 2463/14 | 2014 | Food             | Chicken carcass       | Salmon_Fels_1, Entero_BP_4795, Salmon_118970_sal3 |
| SI 2548/14 | 2014 | Animal           | Chicken feces         | Salmon_Fels_1, Escher_pro483                      |
| SI 3836/14 | 2014 | Environment      | Dragging swab         | Salmon_Fels_1, Escher_pro483                      |
| SI 4882/14 | 2014 | Food             | Chicken carcass       | Salmon_Fels_1, Salmon_SPN3UB                      |

| Strain     | Year | Isolation source | Isolation material          | Prophages                                                     |
|------------|------|------------------|-----------------------------|---------------------------------------------------------------|
| SI 4892/14 | 2014 | Food             | Chicken wings               | Salmon_Fels_1, Salmon_SPN3UB                                  |
| SI 4895/14 | 2014 | Food             | Chicken carcass             | Gifsy_1, Salmon_SPN3UB                                        |
| SI 4901/14 | 2014 | Food             | Pig snout                   | Salmon_Fels_1, Salmon_SPN3UB                                  |
| SI 5247/14 | 2014 | Food             | Chicken upper leg and thigh | Gifsy_1, Salmon_SPN3UB                                        |
| SI 342/15  | 2015 | Food             | Swine heart                 | Salmon_Fels_1, Entero_BP_4795, Salmon_118970_sal3             |
| SI 444/15  | 2015 | Food             | Pork filet                  | Gifsy_1, Entero_BP_4795, Salmon_118970_sal3                   |
| SI 447/15  | 2015 | Food             | Smoked and salted pork meat | Gifsy_1, Entero_BP_4795, Salmon_118970_sal3                   |
| SI 1809/15 | 2015 | Animal feed      | Meat animal meal            | Gifsy_1, Salmon_118970_sal3                                   |
| SI 1816/15 | 2015 | Animal feed      | Poultry viscera animal meal | Salmon_Fels_1, Entero_BP_4795, Salmon_118970_sal3             |
| SI 2280/15 | 2015 | Food             | Chicken carcass             | Gifsy_1, Entero_BP_4795, Salmon_118970_sal3                   |
| SI 2302/15 | 2015 | Environment      | Cleaning wipe               | Salmon_Fels_1, Yersin_L_413C                                  |
| SI 2370/15 | 2015 | Food             | Carcass cleaning wipe       | Salmon_Fels_1, Yersin_L_413C                                  |
| SI 2869/15 | 2015 | Food             | Chicken upper leg           | Salmon_Fels_1, Salmon_SPN3UB                                  |
| SI 3056/15 | 2015 | Food             | Chicken carcass             | Salmon_Fels_1, Salmon_SPN3UB                                  |
| SI 4764/15 | 2015 | Environment      | Cleaning wipe               | Gifsy_1, Entero_BP_4795, Salmon_118970_sal3, Salmon_SP_004    |
| SI 5391/15 | 2015 | Environment      | Disposable shoe cover       | Stx2_c_1717, Salmon_SW9                                       |
| SI 5837/15 | 2015 | Environment      | Disposable shoe cover       | Salmon_Fels_1, Salmon_SW9, Salmon_vB_SosS_Oslo                |
| SI 5853/15 | 2015 | Environment      | Disposable shoe cover       | Gifsy_1, Entero_BP_4795, Salmon_SW9                           |
| SI 5859/15 | 2015 | Environment      | Disposable shoe cover       | Gifsy_1, Entero_BP_4795, Salmon_SW9                           |
| SI 5911/15 | 2015 | Environment      | Cleaning wipe               | Gifsy_1, Entero_BP_4795, Salmon_118970_sal3                   |
| SI 5912/15 | 2015 | Environment      | Cleaning wipe               | Gifsy_1, Entero_BP_4795, Salmon_118970_sal3                   |
| SI 5915/15 | 2015 | Environment      | Cleaning wipe               | Gifsy_1, Entero_BP_4795, Salmon_118970_sal3, Entero_fiAA91_ss |
| SI 5923/15 | 2015 | Environment      | Cleaning wipe               | Salmon_Fels_1, Entero_BP_4795, Salmon_118970_sal3             |
| SI 220/16  | 2016 | Environment      | Cleaning wipe               | Salmon_Fels_1, Salmon_118970_sal3, Stx2_c_1717                |
| SI 3687/16 | 2016 | Food             | Chicken carcass             | Gifsy_1, Entero_BP_4795, Salmon_118970_sal3                   |
| SI 4447/16 | 2016 | Food             | Pork sausage                | Gifsy_1, Entero_BP_4795, Salmon_118970_sal3                   |
| SI 5946/16 | 2016 | Food             | Pork rib                    | Salmon_Fels_1, Salmon_118970_sal3                             |
| SI 6987/16 | 2016 | Human            | Human feces                 | Salmon_Fels_1                                                 |
| SI 7876/16 | 2016 | Human            | Human feces                 | Gifsy_1, Entero_BP_4795, Salmon_118970_sal3, Yersin_L_413C    |

| Strain     | Year | Isolation source | Isolation material             | Prophages                                         |
|------------|------|------------------|--------------------------------|---------------------------------------------------|
| SI 11/17   | 2017 | Environment      | Dragging swab                  | Salmon_Fels_1                                     |
| SI 23/17   | 2017 | Environment      | Dragging swab                  | Salmon_Fels_1                                     |
| SI 238/17  | 2017 | Environment      | Dragging swab                  | Gifsy_1                                           |
| SI 872/17  | 2017 | Food             | Chicken carcass                | Salmon_Fels_1, Yersin_L_413C                      |
| SI 1171/17 | 2017 | Environment      | Soil                           | -                                                 |
| SI 1256/17 | 2017 | Environment      | Soil                           | -                                                 |
| SI 2580/17 | 2017 | Human            | Human feces                    | Stx2_c_1717                                       |
| SI 2953/17 | 2017 | Human            | Human fecal swab               | Salmon_Fels_1, Yersin_L_413C                      |
| SI 2954/17 | 2017 | Human            | Human fecal swab               | Salmon_Fels_1, Yersin_L_413C                      |
| SI 3380/17 | 2017 | Human            | Human fecal swab               | Salmon_Fels_1, Yersin_L_413C                      |
| SI 3877/17 | 2017 | Food             | Chicken wings                  | Salmon_Fels_1, Escher_pro483                      |
| SI 3906/17 | 2017 | Environment      | Sieve residue                  | Salmon_Fels_1, Salmon_118970_sal3                 |
| SI 4065/17 | 2017 | Human            | Human feces                    | Salmon_Fels_1, Entero_BP_4795, Salmon_118970_sal3 |
| SI 4067/17 | 2017 | Human            | Human feces                    | Gifsy_1, Entero_BP_4795, Salmon_118970_sal3       |
| SI 4069/17 | 2017 | Human            | Human blood                    | Salmon_Fels_1                                     |
| SI 52/18   | 2018 | Food             | Chicken carcass                | Salmon_Fels_1, Yersin_L_413C                      |
| SI 331/18  | 2018 | Human            | Human fecal swab               | Salmon_Fels_1                                     |
| SI 623/18  | 2018 | Human            | Human feces                    | Yersin_L_413C, Entero_P4                          |
| SI 661/18  | 2018 | Human            | Human feces                    | Salmon_Fels_1                                     |
| SI 942/18  | 2018 | Human            | Human fecal swab               | Salmon_Fels_1, Entero_BP_4795, Salmon_118970_sal3 |
| SI 1634/18 | 2018 | Food             | Yellowtail amberjack fish meat | Gifsy_1, Yersin_L_413C, Entero_P4                 |
| SI 2676/18 | 2018 | Animal           | Avian reproductive matrix      | Gifsy_1, Escher_pro483                            |
